# Supplementary material
Source: publisher site journal article supplement (https://static.cambridge.org/content/id/urn:cambridge.org:id:article:S0317167120000293/resource/name/S0317167120000293supp002.doc)
Supplement: Supplementary file 1 [file S0317167120000293supp002.doc]

**Supplementary table (1):** Laboratory results of the studied population

| **Laboratory characteristics** | **Patients**  (n = 70) | **Control Subjects**  (n = 30) | **P-value** |
| --- | --- | --- | --- |
| **Sodium level; mmol/L**  Range  Mean ± SD  **Hyponatremia; N (%)** | 120.00 – 147.23  136.0 ± 3.7  9 (12.86%) | 132.00 – 183.23  135.2 ± 1.6  0 | 0.467 |
| **Potassium level; mmol/L**  Range  Mean ± SD  **Hyperkalemia; N (%)** | 2.00 – 5.30  4.2 ± 0.6  13 (18.57%) | 3.50 – 5.00  4.1 ± 0.4  0 | 0.493 |
| **Magnesium level; mg/dl**  Range  Mean ± SD  **Hypomagnesaemia; N (%)** | 1.06 – 2.80  2.3 ± 0.8  8 (11.43%) | 1.50 – 2.70  2.0 ± 0.3  0 | 0.455 |
| **Calcium level; mg/dl**  Range  Mean ± SD  **Hypocalceemia; N (%)** | 4.20 – 9.80  7.0 ± 0.3  49 (70%) | 7.00 – 11.00  9.4 ± 0.7  6 (20%) | **0.010** |
| **Phosphate level; mg/dl**  Range  Mean ± SD  **Hyperphosphataemia; N (%)** | 2.70 – 9.30  5.2 ± 1.5  21 (30%) | 2.50 – 4.80  3.5 ± 0.8  0 | **0.001** |
| ***Urea; mmol/L**  Range  Mean ± SD | 6.00 – 30.00  11.1± 3.7 | 2.80 – 5.80  3.5 ± 1.5 | **0.0001** |
| ***Creatinine; µmol/L**  Range  Mean ± SD | 180.00 – 698.00  309.9 ± 98.2 | 66.00 – 121.00  89.3 ± 8.1 | **0.00001** |
| **Prothrombin time; seconds**  Range  Mean ± SD  **Prolonged prothrombin time; N (%)** | 11.00 – 15.30  12.9 ± 1.2  24 (34.3%) | 10.00 – 18.00  11.3 ± 1.1  3 (10%) | 0.445 |
| **Prothrombin concentration**  Range  Mean ± SD | 63.00 – 100.00  85.9 ± 9.9 | 60.00 – 100.00  83.7 ± 8.7 | 0.465 |
| **INR; %**  Range  Mean ± SD | 1.00 – 1.30  1.1 ± 0.1 | 0.8 – 1.10  1.0 ± 0.1 | 1.00 |
| **AST; µ/l**  Range  Mean ± SD | 13.00 – 68.00  24.9 ± 9.3 | 15.00 – 55.00  26.5 ± 12.2 | 0.336 |
| **ALT; µ/l**  Range  Mean ± SD | 13.00 – 85.00  29.5 ± 4.7 | 19.00 – 56.00  33.6 ± 7.7 | 0.428 |
| **Total bilirubin; µmol/l**  Range  Mean ± SD | 3.00 – 18.00  9.0 ± 3.4 | 3.50 – 15.00  10.0 ± 3.4 | 0.822 |
| **Albumin; g/L**  Range  Mean ± SD  **Hypoalbuminemia; N (%)** | 1.30 – 4.80  3.0 ± 0.6  29 (37.1%) | 3.00 – 5.00  3.9 ± 0.6  2 (6.7%) | **0.052**  **0.0001** |
| **WBCs count; per ml of blood**  Range  Mean ± SD | 4,700 – 10,500  7,591 ± 2,244 | 4,500 – 11,350  7,516 ± 1,873 | 0.883 |
| **RBCs count; million/mcl**  Range  Mean ± SD  **Low RBCs; N (%)** | 1.88 – 4.50  3.2 ± 0.6  46 (68.57%) | 2.65 – 6.20  4.8 ± 0.8  1 (3.3%) | **0.032**  **0.0001** |
| **HGB; mg/dl**  Range  Mean ± SD  **Anemia** | 6.00 – 12.00  8.8 ± 1.4  46 (68.57%) | 10.00 – 14.87  11.5 ± 1.5  3 (10%) | **0.002**  **0.0001** |
| **Platelet count; per microliter of blood**  Range  Mean ± SD | 250,000 – 350,000  326,74 ± 34,942 | 250,000 – 450,000  340,33 ± 32,55 | 0.331 |
| **Random blood sugar; mmol/l**  Range  Mean ± SD  **Hyperglycemia; N (%)** | 3.40 – 13.00  6.8 ± 1.4  16 (22.9%) | 4.00 – 5.80  4.8 ± 0.8  0 | **0.001** |
| **ABG**  **PH**  Range  Mean ± SD  **PO2**  Range  Mean ± SD  **PCO2**  Range  Mean ± SD  **HCO; MEq/L**  Range  Mean ± SD  **O2 saturation**  Range  Mean ± SD | 7.29 – 7.43  7.35 ± 0.03  88.00 – 99.00  91.3 ± 3.9  23.00 – 42.00  35.1 ± 3.1  10.00 – 24.00  16.8 ± 4.0  80 -100  93.6 ± 2.5 | 7.35 – 7.45  7.38 ± 0.02  88.00 – 100.00  94.0 ± 3.3  32.00 – 42.00  37.1 ± 2.4  22.00 – 26.00  22.5 ± 1.8  90 -100  95.6 ± 2.7 | 0.576  0.558  0.186  **0.001**  0.755 |
| **Metabolic acidosis; N (%)** | 24 (53.33%) | 0 | **-** |
| **Thiamine; nmol/l**  Range  Mean ± SD  **Number of patients with low concentrations (%)** | 44 – 120  62.3 ± 3.0  48 (68.6%) | 60 – 160  97.2 ± 5.7  8 (26.7%) | **0.001**  **0.001** |
| **Lactate; mmol/l**  Range  Mean ± SD  **Number of patients with lactic acidosis (%)** | 0.56 – 2.00  1.6 ± 0.1  0 | 0.56 – 2.22  0.7 ± 0.2  0 | 0.126  - |

Data were expressed as number (%); range and mean ± SD

AST, aspartate transaminase; ALT, alanine transaminase; ABG, arterial blood gases

*Urea and Creatinine levels for 6 months (median)
